# Supplementary material for: Structural conversion of three copper(ii) complexes with snapshot observations based on the different crystal colours and morphology
Source: Royal Society of Chemistry journal article supplement (doi:10.1039/d0ra07231a), 2020-01-01
Supplement: d0ra07231a1.pdf [file d0ra07231a1.pdf]

## Supporting Information

### **Structural conversion of three Copper(II) complexes with snapshot observation based on the different crystal colours and morphology**

Hao Su<sup>a</sup>, Zhongkui Li,<sup>a</sup> Junrui Tan,<sup>a</sup> Hongwei Ma,<sup>b</sup> Li Yan<sup>b</sup> and Hui Li<sup>\*a</sup>

*<sup>a</sup> Key Laboratory of Cluster Science of Ministry of Education, School of Chemistry and Chemical  
Engineering, Beijing Institute of Technology, Beijing 100081, P. R. China*

*\*E-mail: lihui@bit.edu.cn*

*<sup>b</sup> Analytical and Testing Center, Beijing Institute of Technology, Beijing 102488, China*

## Table of Content

### S1. Characterization of L, 1, 2 and 3.

**Fig. S1.**  $^1\text{H}$  NMR spectra of L.

**Fig. S2.** IR spectra of L, 1, 2 and 3.

**Fig. S3.** Coordination modes of the metal in the compounds 1(a), 2(b) and 3(c).

**Fig. S4.** Simulation and experiment PXRD pattern of 1, 2 and 3.

**Fig. S5.** TG curves of 1, 2 and 3.

### S2. Crystal Structure Information List of 1, 2 and 3.

**Table S1.** Selected bond distances ( $\text{\AA}$ ) and angles ( $^\circ$ ) for 1.

**Table S2.** Selected bond distances ( $\text{\AA}$ ) and angles ( $^\circ$ ) for 2.

**Table S3.** Selected bond distances ( $\text{\AA}$ ) and angles ( $^\circ$ ) for 3.

### S3. Crystal Structure and conversion of 2.

**Fig. S6.** 2D layer structure of 2.

**Fig. S7.** The rhombus-shaped crystals of 2 convert quickly to rod-shaped crystals of 1 in methanol solution within 10 min.

**Fig. S8.** PXRD pattern of 2 after soaking in MeOH solution.

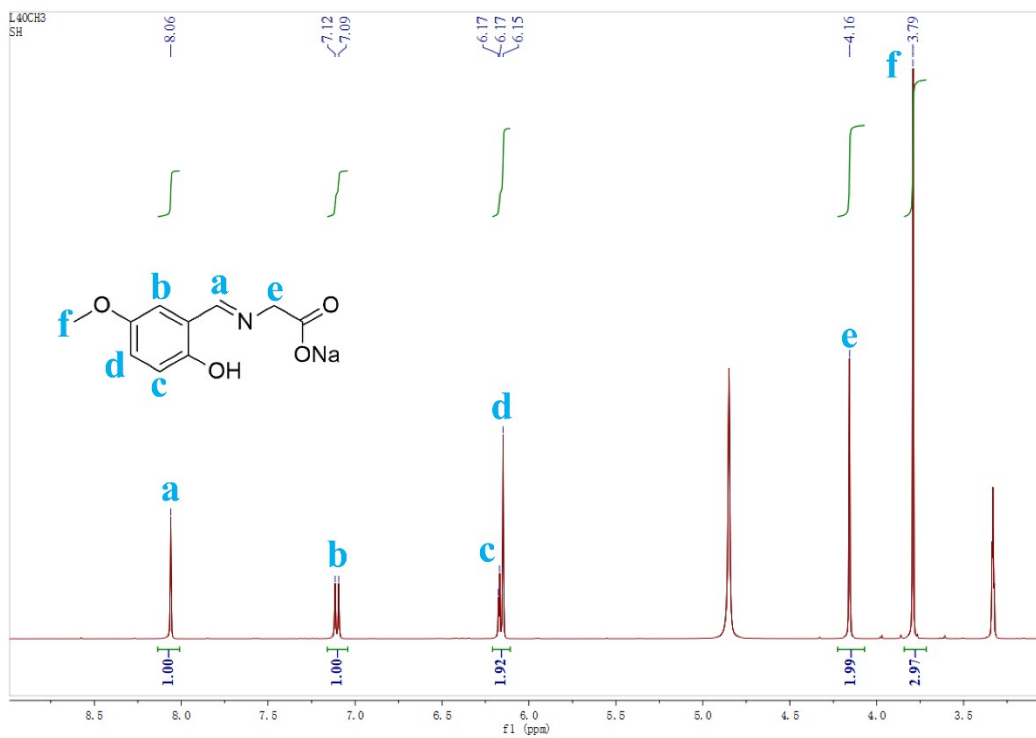

Fig. S1.  $^1\text{H}$  NMR spectra of L.

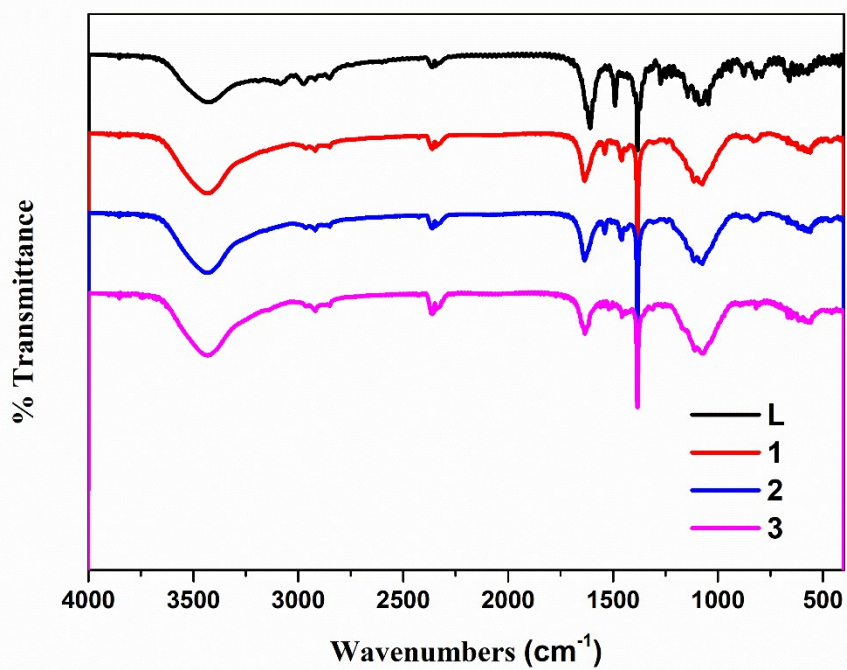

Fig. S2. IR spectra of L, 1, 2 and 3.

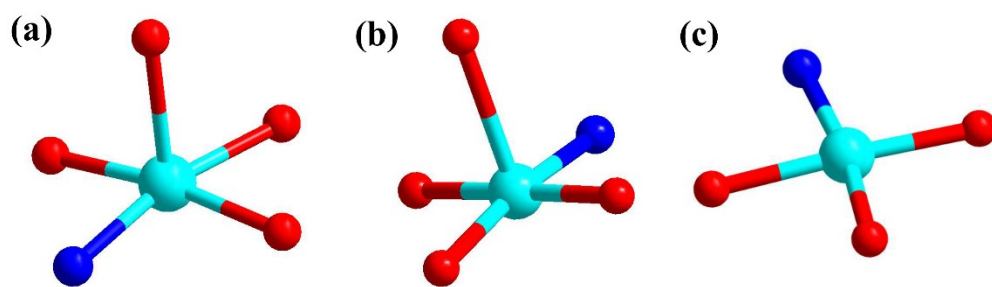

**Fig. S3.** Coordination modes of the metal in the compounds **1(a)**, **2(b)** and **3(c)**.

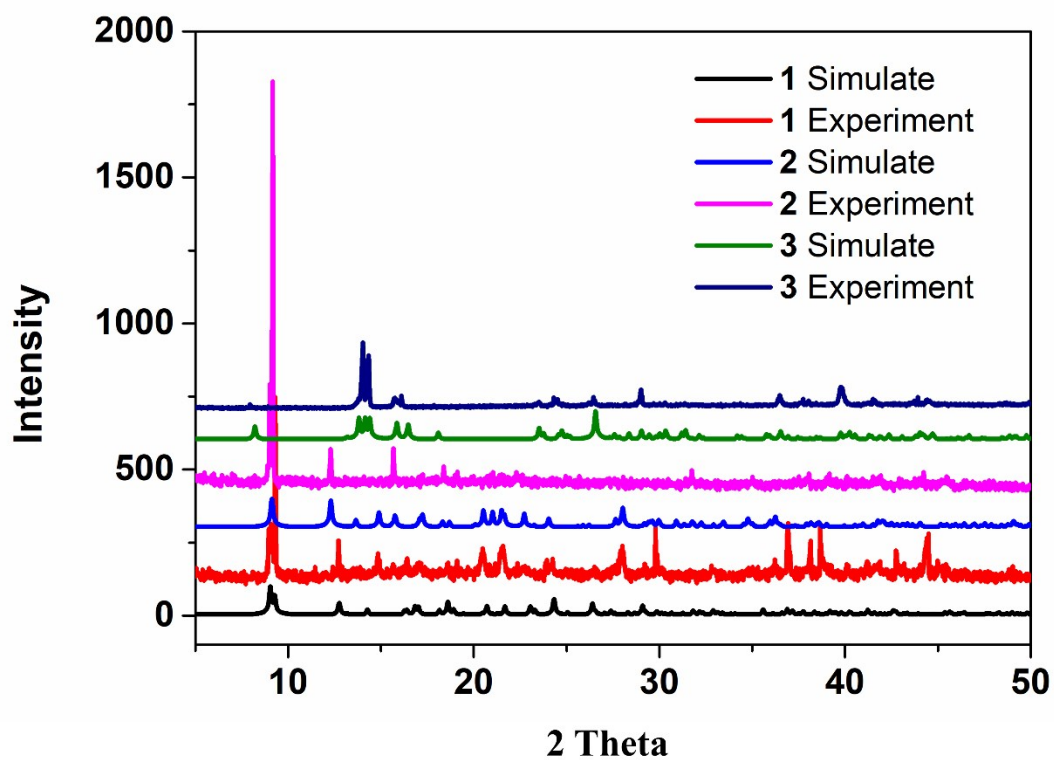

Fig. S4. Simulation and experiment PXR D pattern of 1, 2 and 3.

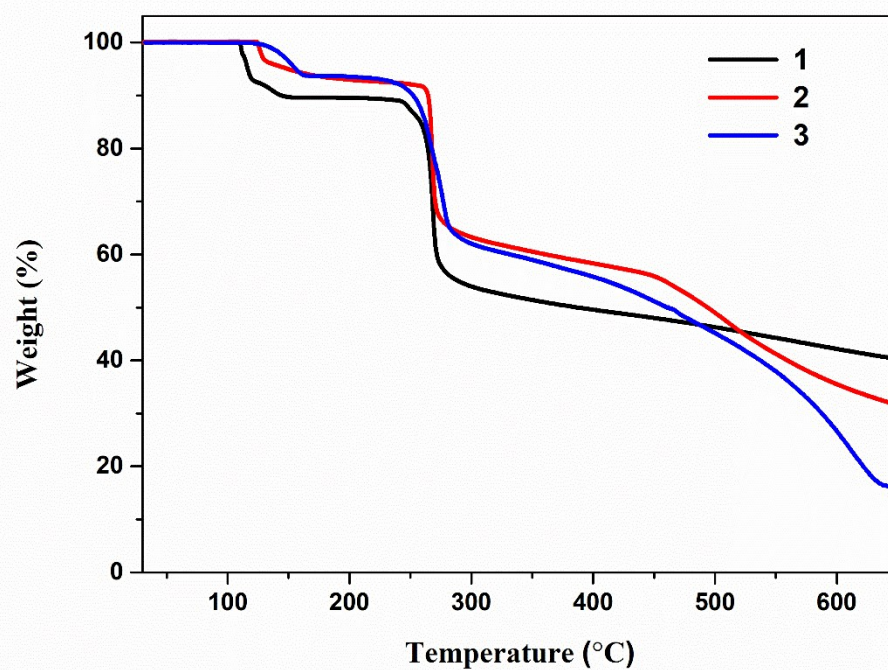

Fig. S5. TG curves of 1, 2 and 3.

**Table S1.** Selected bond distances (Å) and angles (°) for **1**.

|                 |            |                 |            |
|-----------------|------------|-----------------|------------|
| Cu(1)–N(2)      | 1.929(2)   | Cu(1)–O(2)      | 1.958(2)   |
| Cu(1)–O(1)      | 1.9659(18) | Cu(1)–O(1)      | 1.9983(18) |
| Cu(1)–O(5)      | 2.252(2)   |                 |            |
| N(2)–Cu(1)–O(2) | 82.94(9)   | N(2)–Cu(1)–O(1) | 93.11(8)   |
| O(2)–Cu(1)–O(1) | 171.02(8)  | N(2)–Cu(1)–O(1) | 167.65(9)  |
| O(2)–Cu(1)–O(1) | 103.59(8)  | O(1)–Cu(1)–O(1) | 78.88(8)   |
| N(2)–Cu(1)–O(5) | 100.02(9)  | O(2)–Cu(1)–O(5) | 93.53(9)   |
| O(1)–Cu(1)–O(5) | 95.10(8)   | O(1)–Cu(1)–O(5) | 90.13(8)   |

**Table S2.** Selected bond distances (Å) and angles (°) for **2**.

|                 |          |                 |          |
|-----------------|----------|-----------------|----------|
| Cu(1)–O(3)      | 1.906(6) | Cu(1)–N(1)      | 1.920(8) |
| Cu(1)–O(2)      | 1.959(6) | Cu(1)–O(1)      | 1.962(6) |
| Cu(1)–O(3)      | 2.433(6) |                 |          |
| O(3)–Cu(1)–N(1) | 94.9(3)  | O(3)–Cu(1)–O(2) | 85.2(3)  |
| N(1)–Cu(1)–O(2) | 171.2(3) | O(3)–Cu(1)–O(1) | 177.5(3) |
| N(1)–Cu(1)–O(1) | 83.7(3)  | O(2)–Cu(1)–O(1) | 95.8(3)  |
| O(3)–Cu(1)–O(3) | 90.1(2)  | N(1)–Cu(1)–O(3) | 95.0(3)  |
| O(2)–Cu(1)–O(3) | 93.8(3)  | O(1)–Cu(1)–O(3) | 92.2(2)  |

**Table S3.** Selected bond distances (Å) and angles (°) for **3**.

|                 |            |                 |            |
|-----------------|------------|-----------------|------------|
| Cu(1)–O(1)      | 1.883(2)   | Cu(1)–N(1)      | 1.921(2)   |
| Cu(1)–O(2)      | 1.931(2)   | Cu(1)–O(5)      | 1.933(2)   |
| O(1)–Cu(1)–N(1) | 95.62(9)   | O(1)–Cu(1)–O(2) | 176.21(10) |
| N(1)–Cu(1)–O(2) | 84.01(10)  | O(1)–Cu(1)–O(5) | 93.52(10)  |
| N(1)–Cu(1)–O(5) | 169.80(10) | O(2)–Cu(1)–O(5) | 87.16(10)  |

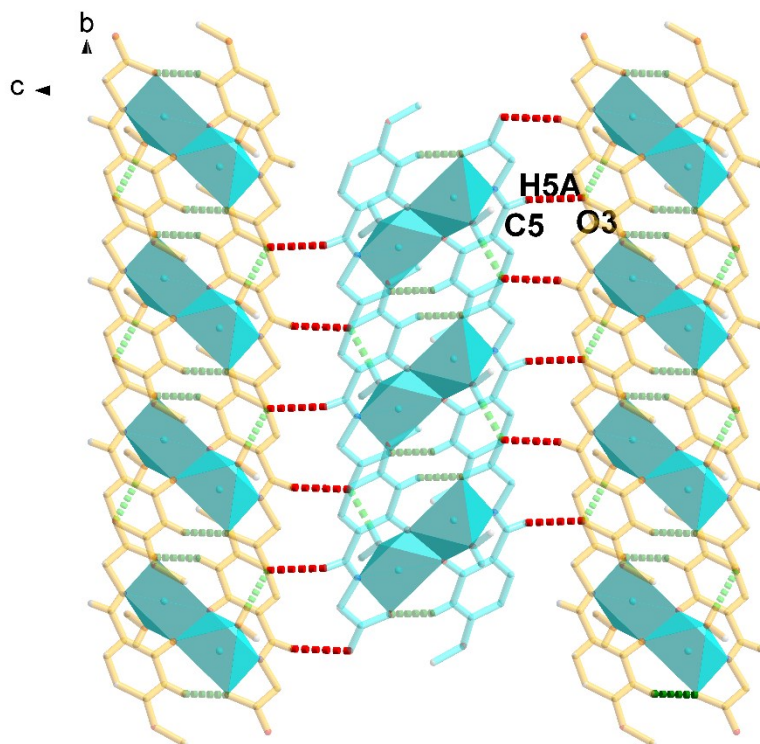

**Fig. S6.** 2D layer structure of **2**.

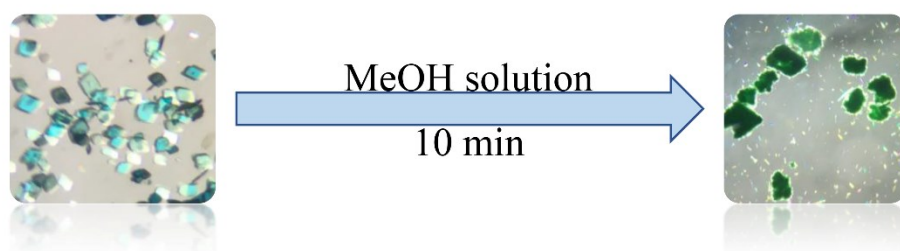

**Fig. S7.** The rhombus-shaped crystals of **2** convert quickly to rod-shaped crystals of **1** in methanol solution within 10 min.

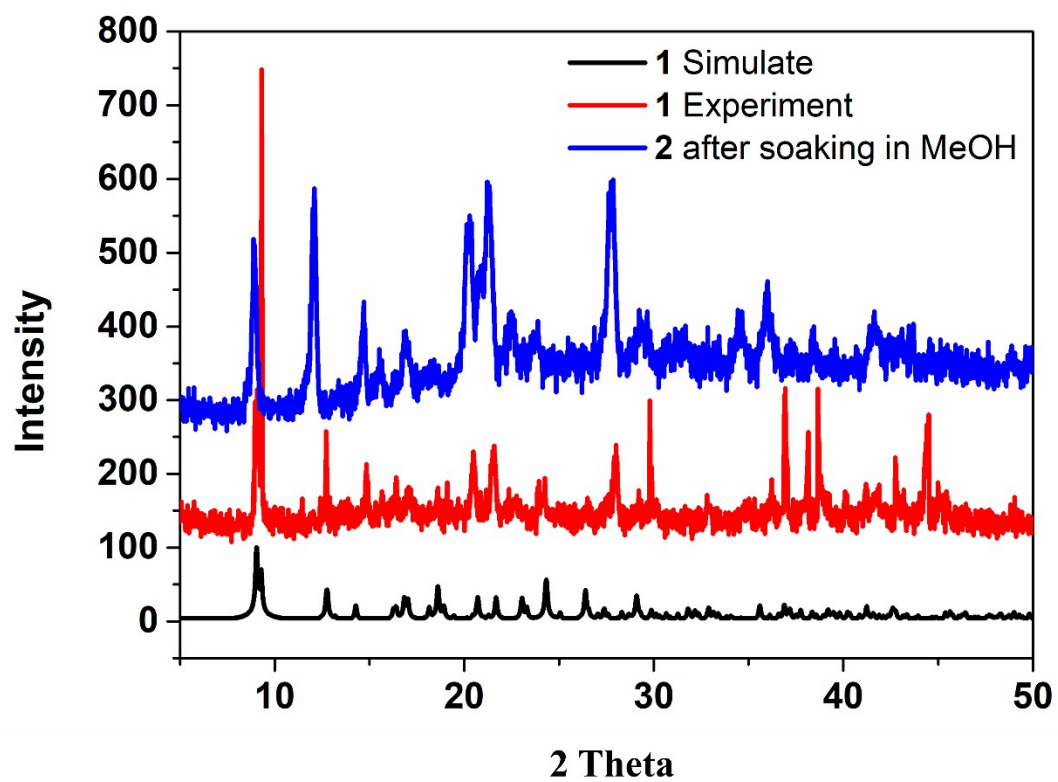

Fig. S8. PXRD pattern of 2 after soaking in MeOH solution.
